# Supplementary material
Source: MDPI journal article supplement (https://www.mdpi.com/2073-4441/11/9/1930)
Supplement: s1 [file s1]

# SUPPLEMENTARY MATERIAL-A

TABLE S1. Land use classification criteria applied on this study.

| Type of land use [46,51]                               | Natural land use cover or anthropogenically influenced cover | Selected land use criteria for this study [44]                                                                                    |
|--------------------------------------------------------|--------------------------------------------------------------|-----------------------------------------------------------------------------------------------------------------------------------|
| Microphyllous desert shrubland                         | Natural                                                      | Natural land use                                                                                                                  |
| Rosetophyllous desert shrubland                        | Natural                                                      | Natural land use                                                                                                                  |
| Tamaulipan thornscrub                                  | Natural                                                      | Natural land use                                                                                                                  |
| Xerophitic scrubland mesquite                          | Natural                                                      | Natural land use                                                                                                                  |
| Piedmont scrub                                         | Natural                                                      | Natural land use                                                                                                                  |
| Secondary vegetation of Tamaulipan thornscrub          | Anthropic                                                    | Classification of land use will depend on the type of anthropic pressure closest to this type of land use. (Urban/ Agricultural). |
| Secondary vegetation of Piedmont scrub                 | Anthropic                                                    | Classification of land use will depend on the type of anthropic pressure closest to this type of land use. (Urban/ Agricultural). |
| Secondary vegetation of Microphyllous desert shrubland | Anthropic                                                    | Classification of land use will depend on the type of anthropic pressure closest to this type of land use. (Urban/ Agricultural). |
| Permanent grassland                                    | Anthropic                                                    | Agricultural land use                                                                                                             |
| Induced grassland                                      | Anthropic                                                    | Agricultural land use                                                                                                             |
| Annual rainfed agriculture                             | Anthropic                                                    | Agricultural land use                                                                                                             |
| Annual irrigated agriculture                           | Anthropic                                                    | Agricultural land use                                                                                                             |
| Urban zone                                             | Anthropic                                                    | Urban land use                                                                                                                    |
| Human settlements                                      | Anthropic                                                    | Urban land use                                                                                                                    |
| Non-vegetated area                                     | Anthropic                                                    | Urban land use                                                                                                                    |

# SUPPLEMENTARY MATERIAL-A

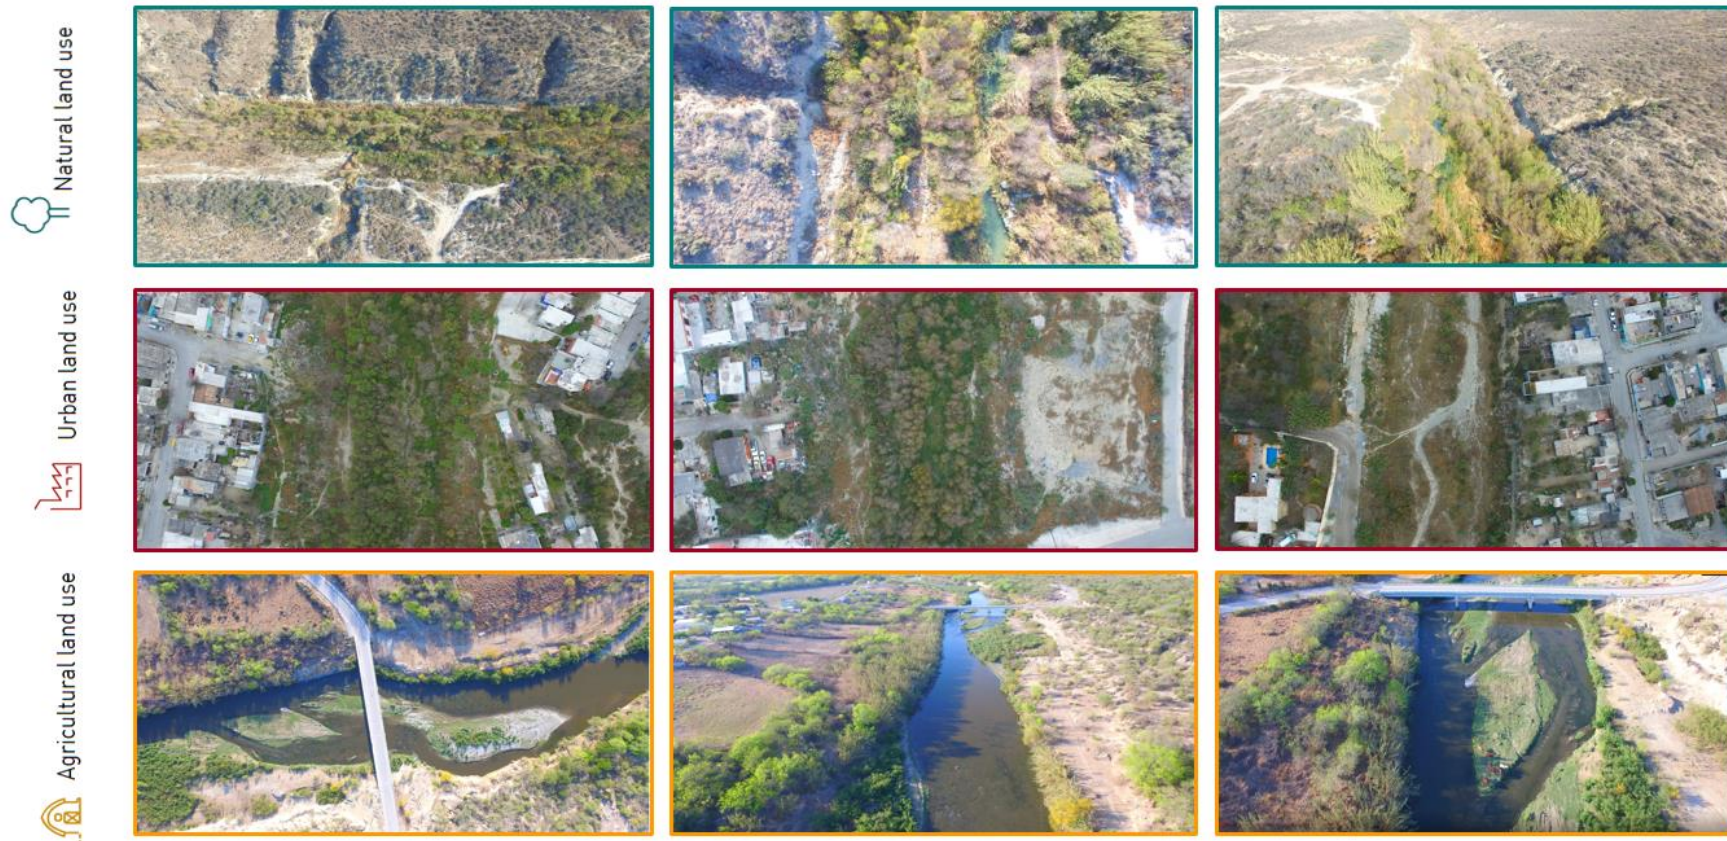

**Figure S1. Pesquería River Sub-Basin drone aerial photographs.** Natural land use photographs correspond to sampling site 1, urban land use photographs to sampling site 4 and agricultural land use photographs to sampling site 15.

**TABLE S2. Land use classification and percentage of each site**

| Sampling Site | SS-Name-reference | X-Location | Y-Location | DBSS-KM | D-KM  | Channel width (m) | LUC | Nat % | Urb % | Agr % | Description of Land use in each sampling site.                                                                                                            |
|---------------|-------------------|------------|------------|---------|-------|-------------------|-----|-------|-------|-------|-----------------------------------------------------------------------------------------------------------------------------------------------------------|
| SS1           | García            | 334092.63  | 2855097.19 | 0.0     | 0.0   | 18                | Nat | 100   | 0     | 0.0   | Natural Land use                                                                                                                                          |
| SS2           | García            | 335270     | 2854277    | 1.4     | 1.4   | 17.17             | Nat | 100   | 0     | 0.0   | Natural Land use                                                                                                                                          |
| SS3           | García            | 336345     | 2855062    | 2.1     | 3.5   | 19.21             | Nat | 73    | 27    | 0.0   | Natural land use and starts the urbanization on the left bank of the river.                                                                               |
| SS4           | García            | 342461.64  | 2854345.01 | 7.1     | 10.7  | 18.01             | Urb | 0     | 100   | 0     | Urbanization in the left and right bank of the river.                                                                                                     |
| SS5           | García            | 353772.06  | 2853947.15 | 13.0    | 23.7  | 18.88             | Urb | 0     | 100   | 0     | Urbanization human settlements in left and right bank of the river.                                                                                       |
| SS6           | García            | 361061.29  | 2854164    | 8.2     | 31.9  | 19.26             | Urb | 0     | 100   | 0     | Urbanization and human settlements left and right bank of the river. Small strips of riparian forest/vegetation less than 10 m width of the sampled area. |
| SS7           | Escobedo          | 363688.43  | 2855392.36 | 3.8     | 35.7  | 19.33             | Urb | 0     | 100   | 0     | Urbanization and human settlements left and right bank of the river. Small strips of riparian forest/vegetation less than 10 m width of the sampled area. |
| SS8           | Escobedo          | 369493     | 2854813    | 6.6     | 42.3  | 17.1              | Urb | 0     | 100   | 0     | Urbanization and human settlements left and right bank of the river. Small strips of riparian forest/vegetation less than 15 m width of the sampled area. |
| SS9           | Santa Rosa        | 377346.01  | 2856678.33 | 10.5    | 52.8  | 20.4              | Urb | 0     | 100   | 0     | Urbanization and human settlements left and right bank of the river.                                                                                      |
| SS10          | Agua fría         | 384632.56  | 2855949.88 | 8.9     | 61.7  | 18.83             | Agr | 0     | 0     | 100   | Agricultural fields                                                                                                                                       |
| SS11          | Pesquería         | 393388.76  | 2852351.96 | 10.0    | 71.7  | 21.27             | Agr | 39.7  | 0     | 60.3  | Agricultural fields. Riparian forest/ vegetation is present in one of the river banks.                                                                    |
| SS12          | Hipódromo         | 400753.38  | 2849990.38 | 9.6     | 81.3  | 19.85             | Agr | 0     | 0     | 100   | Agricultural fields.                                                                                                                                      |
| SS13          | Pesquería         | 420004.01  | 2845289.61 | 20.6    | 101.9 | 29.7              | Agr | 0     | 0     | 100   | Agricultural fields.                                                                                                                                      |
| SS14          | San Isidro        | 424212.44  | 2840113.73 | 7.6     | 109.5 | 20.8              | Agr | 0     | 0     | 100   | Agricultural fields. Small strips of riparian vegetation.                                                                                                 |
| SS15          | El Refugio        | 431131.22  | 2837805.68 | 8.4     | 117.9 | 32.2              | Agr | 48    | 0     | 52    | Agricultural fields. Riparian forest/ vegetation is fully present in one of the river banks.                                                              |
| SS16          | San Agustín       | 463589.31  | 2865321.59 | 60.0    | 177.9 | 27.34             | Agr | 0     | 0     | 100   | Agricultural fields. Small strips of riparian vegetation.                                                                                                 |

| CODE        | Meaning                         |
|-------------|---------------------------------|
| Nat         | Natural                         |
| Urb         | Urban Zones                     |
| Agr         | Agriculture                     |
| SS          | Sampling Site                   |
| DBSS        | Distance between sampling sites |
| DF-SS1-SS16 | Distance from site 1-16         |
| LUC         | Land use classification         |

## SUPPLEMENTARY MATERIAL-A

# SUPPLEMENTARY MATERIAL-A

TABLE S3. Sampling site impacts classification

| Sampling Site | LUC | Impacts                                        | Distance from the impact to the site                                                                                                                      |
|---------------|-----|------------------------------------------------|-----------------------------------------------------------------------------------------------------------------------------------------------------------|
| SS1           | Nat | No impact present                              | Natural land use                                                                                                                                          |
| SS2           | Nat | No impact present                              | Natural land use                                                                                                                                          |
| SS3           | Nat | WSP                                            | The water discharge is located 200 meters before reaching the next sampling site (ss4).                                                                   |
| SS4           | Urb | WWTP / Urbanization/ B) Indirect from Industry | Urbanization and human settlements left and right bank of the river.                                                                                      |
| SS5           | Urb | Urbanization                                   | The discharge comes from the WWTP located 12.8 km upstream / The indirect discharge from industry comes from the 9.36 km upstream from the sampling site. |
| SS6           | Urb | CD/ HS                                         | Clandestine dump is 0.10 km upstream from the sampling site. Human settlements are 0.15km upstream from the SS.                                           |
| SS7           | Urb | Urbanization                                   | Urbanization and human settlements left and right bank of the river.                                                                                      |
| SS8           | Urb | Urbanization                                   | Urbanization and human settlements left and right bank of the river.                                                                                      |
| SS9           | Urb | A) WWTP                                        | The discharge comes from 8.45 km upstream from the sampling site 8.                                                                                       |
| SS10          | Agr | A) WWTP/ B) WWTP                               | The discharge comes from A) 6.87 km / B) 3 km upstream from the sampling site 9.                                                                          |
| SS11          | Agr | Agriculture                                    | Agricultural fields                                                                                                                                       |
| SS12          | Agr | WWTP                                           | The discharge comes from 3 km upstream from the sampling site 11.                                                                                         |
| SS13          | Agr | WTTP/ Agriculture                              | The discharge comes from 15.7 km upstream from the sampling site 12 /Agricultural fields                                                                  |
| SS14          | Agr | Agriculture                                    | Agricultural fields                                                                                                                                       |
| SS15          | Agr | WSP                                            | The discharge comes from 44 km upstream from the sampling site.                                                                                           |
| SS16          | Agr | Agriculture                                    | Agricultural fields                                                                                                                                       |

| CODE | Meaning                    |
|------|----------------------------|
| WSP  | Water Stabilization Pond   |
| WWTP | Wastewater Treatment Plant |
| CD   | Clandestine Dump           |
| HS   | Human settlements          |



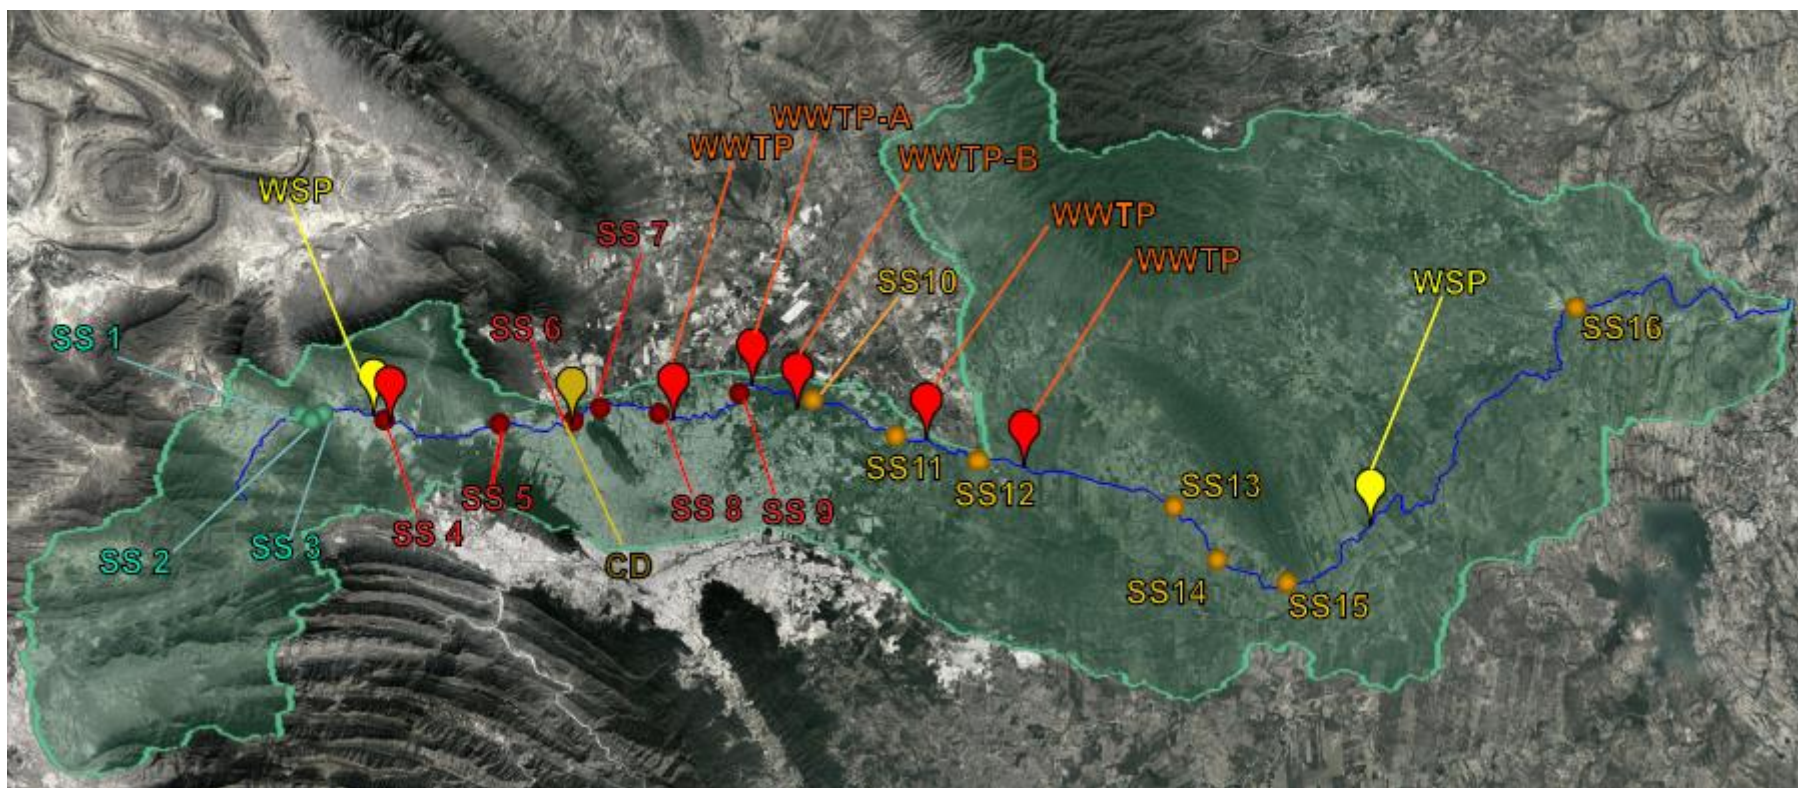

Figure S2. Pesquería River Sub-Basin drone aerial photographs

| CODE | Meaning                    |
|------|----------------------------|
| WSP  | Water Stabilization Pond   |
| WWTP | Wastewater Treatment Plant |
| CD   | Clandestine Dump           |
| SS   | Sampling Sites             |

## SUPPLEMENTARY MATERIAL-A
