# Supplementary material
Source: MDPI journal article supplement (https://www.mdpi.com/2073-4441/11/9/1930)
Supplement: s1 [file s1]

| BIOLOGICAL METRICS REPRESENTATIVE OF LAND USE                                                      |        |      |       |       |        |          |   |    |      | mean ± sem values |       |       |         |       |       |  |              |  |  |
|----------------------------------------------------------------------------------------------------|--------|------|-------|-------|--------|----------|---|----|------|-------------------|-------|-------|---------|-------|-------|--|--------------|--|--|
|                                                                                                    |        |      |       |       |        |          |   |    |      | TukeyHDS          |       |       | NATURAL |       | URBAN |  | AGRICULTURAL |  |  |
| CATEGORY I "TAXONOMIC RICHNESS "                                                                   | ML/MML | TRNS | R2c   | R2m   | R2ad   | p-values | N | U  | A    | mean              | ± sem | mean  | ± sem   | mean  | ± sem |  |              |  |  |
| Richness                                                                                           | LMM    | ST   | 0.7   | 0.94  |        | <0.001   | a | b  | b    | 35.17             | 1.05  | 15.83 | 2.07    | 11.14 | 1.23  |  |              |  |  |
| Rarified Richness                                                                                  | LMM    | ST   | 0.77  | 0.95  |        | <0.001   | a | b  | b    | 33.45             | 1.08  | 13.49 | 1.69    | 9.39  | 1.07  |  |              |  |  |
| Richness OCH (Odonata + Coleoptera + Heteroptera)                                                  | LMM    | ST   | 0.66  | 0.89  |        | <0.001   | a | b  | b    | 12.33             | 0.84  | 5.67  | 0.80    | 3.00  | 0.53  |  |              |  |  |
| Richness EPT (Ephemeroptera + Plecoptera + Trichoptera)                                            | LMM    | SQRT | 0.54  | 0.93  |        | <0.001   | a | b  | b    | 9.67              | 0.61  | 2.00  | 0.55    | 1.29  | 0.40  |  |              |  |  |
| Richness EPT / (richness EPT + richness OCH)                                                       | LMM    | ST   | 0.25  | 0.9   |        | 0.090    | a | a  | a    | 0.44              | 0.03  | 0.20  | 0.04    | 0.19  | 0.05  |  |              |  |  |
| Richness Ephemeroptera                                                                             | LMM    | SQRT | 0.6   | 0.95  |        | 0.001    | a | b  | b    | 4.33              | 0.49  | 0.42  | 0.34    | 0.36  | 0.25  |  |              |  |  |
| Richness Trichoptera                                                                               | LMM    | SQRT | 0.45  | 0.91  |        | 0.001    | a | b  | b    | 5.33              | 0.42  | 1.58  | 0.31    | 0.93  | 0.25  |  |              |  |  |
| Richness Odonata                                                                                   | LMM    | ST   | 0.27  | 0.65  |        | 0.045    | a | ab | b    | 5.00              | 0.63  | 3.33  | 0.43    | 2.29  | 0.44  |  |              |  |  |
| Richness Coleoptera                                                                                | LMM    | SQRT | 0.52  | 0.82  |        | 0.002    | a | a  | b    | 5.00              | 0.97  | 1.92  | 0.38    | 0.50  | 0.25  |  |              |  |  |
| Richness Diptera                                                                                   | LMM    | SQRT | 0.62  | 0.87  |        | <0.001   | a | b  | b    | 7.17              | 0.48  | 3.33  | 0.48    | 2.21  | 0.15  |  |              |  |  |
| Richness Diptera without Chironomidae                                                              | LMM    | SQRT | 0.48  | 0.86  | <0.001 | a        | b | b  | 6.17 | 0.48              | 2.42  | 0.48  | 1.21    | 0.15  |       |  |              |  |  |
| Richness Gasteropoda                                                                               | LMM    | SQRT | 0.1   | 0.66  | 0.350  | a        | a | a  | 1.00 | 0.37              | 1.33  | 0.36  | 0.43    | 0.17  |       |  |              |  |  |
| Richness Non-insect taxa (Amphipoda + Copepoda + Ostracoda + Gateropoda + Oligochaeta + Hirudinea) | LMM    | SQRT | 0.001 | 0.53  | 0.980  | a        | a | a  | 4.17 | 0.40              | 4.25  | 0.57  | 4.29    | 0.40  |       |  |              |  |  |
| CATEGORY III "RICHNESS COMPOSITION"                                                                |        |      |       |       |        |          | N | U  | A    | MEAN              | SEM   | MEAN  | SEM     | MEAN  | SEM   |  |              |  |  |
| % OCH (Odonata + Coleoptera + Heteroptera)                                                         | LM     | SQRT |       |       | 0.41   | <0.001   | a | b  | b    | 0.08              | 0.02  | 0.05  | 0.02    | 0.01  | 0.00  |  |              |  |  |
| % EPT (Ephemeroptera + Plecoptera + Trichoptera)                                                   | LM     | SQRT |       |       | 0.64   | <0.001   | a | b  | c    | 0.27              | 0.02  | 0.08  | 0.03    | 0.03  | 0.02  |  |              |  |  |
| % EPT / (% EPT + % OCH)                                                                            | LMM    | ST   | 0.16  | 0.75  |        | 0.219    | a | a  | a    | 0.78              | 0.03  | 0.44  | 0.11    | 0.35  | 0.11  |  |              |  |  |
| % Ephemeroptera                                                                                    | LM     | SQRT |       |       | 0.56   | 0.000    | a | b  | b    | 0.16              | 0.04  | 0.02  | 0.02    | 0.01  | 0.00  |  |              |  |  |
| % Trichoptera                                                                                      | LMM    | SQRT | 0.28  | 0.87  |        | 0.640    | a | ab | b    | 0.11              | 0.02  | 0.05  | 0.02    | 0.02  | 0.01  |  |              |  |  |
| % Odonata                                                                                          | LM     | SQRT |       |       | 0.36   | <0.001   | a | a  | b    | 0.03              | 0.00  | 0.02  | 0.01    | 0.00  | 0.00  |  |              |  |  |
| % Coleoptera                                                                                       | LM     | SQRT |       |       | 0.37   | <0.001   | a | a  | b    | 0.04              | 0.01  | 0.04  | 0.02    | 0.00  | 0.00  |  |              |  |  |
| % Diptera                                                                                          | LM     | SQRT |       |       | 0.11   | 0.060    | a | a  | a    | 0.31              | 0.03  | 0.44  | 0.07    | 0.55  | 0.05  |  |              |  |  |
| % Diptera without Chironomidae                                                                     | LM     | ST   |       |       | 0.17   | 0.025    | a | b  | b    | 0.09              | 0.03  | 0.02  | 0.01    | 0.03  | 0.01  |  |              |  |  |
| % Gasteropoda                                                                                      | LM     | SQRT |       |       | 0.16   | 0.027    | a | ab | b    | 0.04              | 0.03  | 0.01  | 0.01    | 0.00  | 0.00  |  |              |  |  |
| % Non-insect taxa (Amphipoda + Copepoda + Ostracoda + Gateropoda + Oligochaeta + Hirudinea)        | LM     | ST   |       |       | -0.024 | 0.540    | a | a  | a    | 0.33              | 0.03  | 0.43  | 0.06    | 0.41  | 0.05  |  |              |  |  |
| % Baetidae / % EPT                                                                                 | LMM    | ST   | 0.51  | 0.84  |        | 0.001    | a | b  | b    | 0.31              | 0.09  | 0.02  | 0.01    | 0.03  | 0.02  |  |              |  |  |
| % Baetidae / % Ephemeroptera                                                                       | LMM    | ST   | 0.31  | 0.77  |        | 0.037    | a | b  | b    | 0.65              | 0.13  | 0.09  | 0.08    | 0.12  | 0.08  |  |              |  |  |
| % Hydropsychidae / % EPT                                                                           | LMM    | SQRT | 0.056 | 0.36  |        | 0.690    | a | a  | a    | 0.19              | 0.11  | 0.37  | 0.12    | 0.39  | 0.11  |  |              |  |  |
| % Hydropsychidae / % Ephemeroptera                                                                 | LMM    | SQRT | 0.69  | 0.007 |        | 0.993    | a | a  | a    | 0.40              | 0.11  | 0.40  | 0.11    | 0.42  | 0.12  |  |              |  |  |
| % Chironomidae                                                                                     | LM     | ST   |       |       | 0.19   | 0.016    | a | b  | b    | 0.22              | 0.03  | 0.42  | 0.08    | 0.53  | 0.04  |  |              |  |  |
| % Oligochaeta                                                                                      | LM     | SQRT |       |       | 0.05   | 0.170    | a | a  | a    | 0.05              | 0.02  | 0.14  | 0.05    | 0.21  | 0.06  |  |              |  |  |
| % Chironomidae + % Oligochaeta                                                                     | LM     | ST   |       |       | 0.34   | 0.001    | a | b  | b    | 0.27              | 0.02  | 0.55  | 0.09    | 0.73  | 0.05  |  |              |  |  |
| CATEGORY I "DIVERSITY INDEXES"                                                                     |        |      |       |       |        |          | N | U  | A    | MEAN              | SEM   | MEAN  | SEM     | MEAN  | SEM   |  |              |  |  |
| Shannon's Diversity using base e                                                                   | LM     | ST   |       |       | 0.66   | <0.001   | a | b  | b    | 2.52              | 0.09  | 1.29  | 0.15    | 1.01  | 0.07  |  |              |  |  |
| Simpson's Diversity                                                                                | LM     | SQRT |       |       | 0.53   | <0.001   | b | a  | a    | 0.13              | 0.02  | 0.41  | 0.06    | 0.47  | 0.03  |  |              |  |  |
| Pielou's Evenness                                                                                  | LM     | ST   |       |       | 0.46   | <0.001   | a | b  | b    | 0.71              | 0.03  | 0.47  | 0.04    | 0.44  | 0.02  |  |              |  |  |
| CATEGORY IV "FUNCTIONAL FEEDING GROUPS"                                                            |        |      |       |       |        |          | N | U  | A    | MEAN              | SEM   | MEAN  | SEM     | MEAN  | SEM   |  |              |  |  |
| Richness Collectors-Gatherers                                                                      | LM     | SQRT |       |       | 0.8    | <0.001   | a | b  | c    | 10.00             | 0.26  | 4.50  | 0.47    | 4.43  | 0.31  |  |              |  |  |
| % Collectors-Gatherers                                                                             | LM     | SQRT |       |       | 0.42   | <0.001   | a | b  | b    | 0.68              | 0.04  | 0.86  | 0.04    | 0.93  | 0.02  |  |              |  |  |
| Richness Predators                                                                                 | LMM    | ST   | 0.57  | 0.85  |        | <0.001   | a | b  | b    | 12.67             | 0.92  | 6.33  | 0.87    | 4.00  | 0.64  |  |              |  |  |
| % Predators                                                                                        | LM     | SQRT |       |       | 0.24   | 0.006    | a | ab | b    | 0.09              | 0.02  | 0.07  | 0.03    | 0.02  | 0.01  |  |              |  |  |
| Richness Herbivores                                                                                | LMM    | ST   | 0.59  | 0.88  |        | 0.001    | a | b  | b    | 8.83              | 0.40  | 3.50  | 0.69    | 1.50  | 0.60  |  |              |  |  |
| % Herbivores                                                                                       | LM     | SQRT |       |       | 0.64   | <0.001   | a | b  | c    | 0.15              | 0.04  | 0.03  | 0.01    | 0.00  | 0.00  |  |              |  |  |
| Richness Collectors-Filterers                                                                      | LMM    | SQRT | 0.18  | 0.83  |        | 0.180    | a | a  | a    | 2.83              | 0.31  | 1.25  | 0.37    | 1.21  | 0.24  |  |              |  |  |
| % Collectors-Filterers                                                                             | LM     | SQRT |       |       | 0.31   | 0.002    | a | b  | c    | 0.07              | 0.03  | 0.04  | 0.02    | 0.04  | 0.02  |  |              |  |  |

| Codes                                                           |      |
|-----------------------------------------------------------------|------|
| Linear Mixed Model                                              | LMM  |
| Linear Model                                                    | LM   |
| Transformation                                                  | TRNS |
| Witout transformation                                           | ST   |
| Square Root Transformation                                      | SQRT |
| Coefficient of determination conditional for Linear Mixed Model | R2c  |
| Coefficient of determination marginal for Linear Mixed Model    | R2m  |
| Coefficient of determination adjusted for Linear model          | R2ad |

# **SUPPLEMENTARY MATERIAL-B TABLE S1- Metrics data**

## SUPPLEMENTARY MATERIAL-B

### TABLE S2 Discarded metrics

**Models that responded to the distance from headwaters (HDF)**

```
% EPT
Call:
lm(formula = EPTsq ~ impact + distance, data = dat)

Residuals:
    Min       1Q   Median       3Q      Max
-0.27465 -0.04805  0.00093  0.04183  0.32565

Coefficients:
            Estimate Std. Error t value Pr(>|t|)
(Intercept)  0.5149693   0.0524569   9.817 1.44e-10 ***
impactB      -0.4112627   0.0701392  -5.864 2.64e-06 ***
impactC      -0.7565623   0.1110580  -6.812 2.12e-07 ***
distance      0.0032376   0.0009033   3.584 0.00127 **
---
Signif. codes:  0 '***' 0.001 '**' 0.01 '*' 0.05 '.' 0.1 ' ' 1

Residual standard error: 0.1284 on 28 degrees of freedom
Multiple R-squared:  0.6801, Adjusted R-squared:  0.6458
F-statistic: 19.84 on 3 and 28 DF, p-value: 4.268e-07
```

```
Collector-Filterers %
Lm (formula = CFXsq ~ impact + distance, data = dat)

Residuals:
    Min       1Q   Median       3Q      Max
-0.21572 -0.05795 -0.01728  0.02553  0.26906

Coefficients:
            Estimate Std. Error t value Pr(>|t|)
(Intercept)  0.2323180   0.0523485   4.438 0.000129 ***
impactB      -0.2023677   0.0699943  -2.891 0.007339 **
impactC      -0.4650233   0.1108285  -4.196 0.000248 ***
distance      0.0035183   0.0009015   3.903 0.000545 ***
---
Signif. codes:  0 '***' 0.001 '**' 0.01 '*' 0.05 '.' 0.1 ' ' 1

Residual standard error: 0.1282 on 28 degrees of freedom
Multiple R-squared:  0.3958, Adjusted R-squared:  0.3311
F-statistic: 6.114 on 3 and 28 DF, p-value: 0.002471
```

```
Collector-gatherers richness
Call:
lm(formula = CGR ~ impact * time + distance, data = dat)

Residuals:
    Min       1Q   Median       3Q      Max
-2.5920 -0.3676 -0.0525  0.4470  3.1686

Coefficients:
            Estimate Std. Error t value Pr(>|t|)
(Intercept) 10.969912   1.432033   7.660 5.13e-08 ***
impactB      -5.575059   1.770632  -3.149 0.00421 **
impactC     -10.583983   1.885806  -5.612 7.71e-06 ***
time         -0.666667   0.905661  -0.736 0.46851
distance      0.018422   0.007801   2.361 0.02631 *
impactB:time  -0.333333   1.109204  -0.301 0.76627
impactC:time   2.095238   1.082472   1.936 0.06430 .
---
Signif. codes:  0 '***' 0.001 '**' 0.01 '*' 0.05 '.' 0.1 ' ' 1

Residual standard error: 1.109 on 25 degrees of freedom
Multiple R-squared:  0.8447, Adjusted R-squared:  0.8074
F-statistic: 22.66 on 6 and 25 DF, p-value: 5.586e-09
```
