# Supplementary material
Source: MDPI journal article supplement (https://www.mdpi.com/2073-4441/11/9/1930)
Supplement: s1 [file s1]

Archive with 2 entries (2 files):
- SUPPLEMENTARY/S2- SUPPLEMENTARY MATERIAL B_16F.pdf
- SUPPLEMENTARY/SUPPLEMENTARTY_1A_FINAL16.pdf
